# Supplementary material for: A graphitic-C3N4 derivative containing heptazines merged with phenyls: synthesis, purification and application as a high-efficiency metal-free quasi-green phosphor for white LEDs
Source: Royal Society of Chemistry journal article supplement (doi:10.1039/d3ra00473b), 2023-01-01
Supplement: d3ra00473b1.pdf [file d3ra00473b1.pdf]

## Supporting Information

### **A graphitic-C<sub>3</sub>N<sub>4</sub> derivative containing heptazines merging with phenyls: synthesis, purification and application as a high-efficient metal-free quasi-green phosphor for white LEDs**

Huaijun Tang,<sup>\*a</sup> Qihong Chen,<sup>a</sup> Guoyun Meng,<sup>\*b</sup> Shiyu Lu,<sup>a</sup> Jing Qin,<sup>a</sup> Kaixin Yang,<sup>a</sup> Long Gao,<sup>a</sup> Zhengliang Wang,<sup>a</sup> and Yonghui He<sup>\*c</sup>

<sup>a</sup> Key Laboratory of Green-Chemistry Materials in University of Yunnan Province, National and Local Joint Engineering Research Center for Green Preparation Technology of Biobased Materials, School of Chemistry & Environment, Yunnan Minzu University, Kunming, 650500, P. R. China.

E-mail: tanghuaijun@sohu.com

<sup>b</sup> Key Lab of Organic Optoelectronics and Molecular Engineering of Ministry of Education, Department of Chemistry, Tsinghua University, Beijing, 100084, P. R. China.

E-mail: mengguoyun@sina.com

<sup>c</sup> Key Laboratory of Chemistry in Ethnic Medicinal Resources, State Ethnic Affairs Commission & Ministry of Education, Yunnan Minzu University, Kunming 650500, China.

E-mail: hee\_csu@126.com

## Table of Contents

|                                                                                                                                                                                                                     |   |
|---------------------------------------------------------------------------------------------------------------------------------------------------------------------------------------------------------------------|---|
| <b>Figure S1.</b> s-g-C <sub>3</sub> N <sub>4</sub> -Ph in the tube of the sublimator under natural light and 365 nm UV light, s-g-C <sub>3</sub> N <sub>4</sub> -Ph in sample bottle .....                         | 1 |
| <b>Figure S2.</b> The PL decay curve and its tri-exponential fitting line of s-g-C <sub>3</sub> N <sub>4</sub> -Ph .....                                                                                            | 1 |
| <b>Figure S3.</b> photographs of some LEDs in working .....                                                                                                                                                         | 2 |
| <b>Table S1.</b> PL data of g-C <sub>3</sub> N <sub>4</sub> , g-C <sub>3</sub> N <sub>4</sub> -Ph and s-g-C <sub>3</sub> N <sub>4</sub> -Ph .....                                                                   | 2 |
| <b>Table S2.</b> $\lambda_{em,max}$ , the maximum PL emission intensities and corresponding relative intensities of s-g-C <sub>3</sub> N <sub>4</sub> -Ph powders measured at every 20 °C from 20 °C to 200 °C..... | 2 |

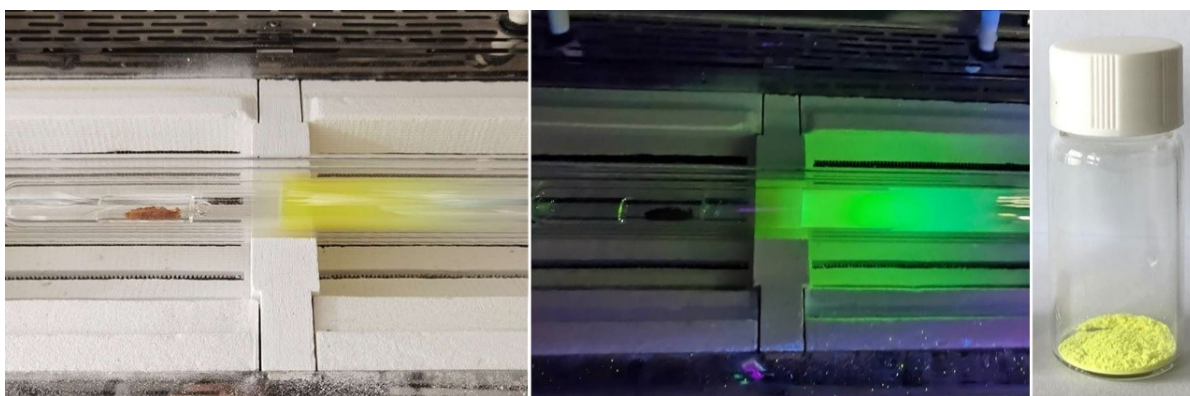

**Figure S1.** s-g-C<sub>3</sub>N<sub>4</sub>-Ph in the tube of the sublimator under natural light (left) and 365 nm UV light (middle), s-g-C<sub>3</sub>N<sub>4</sub>-Ph in sample bottle (right).

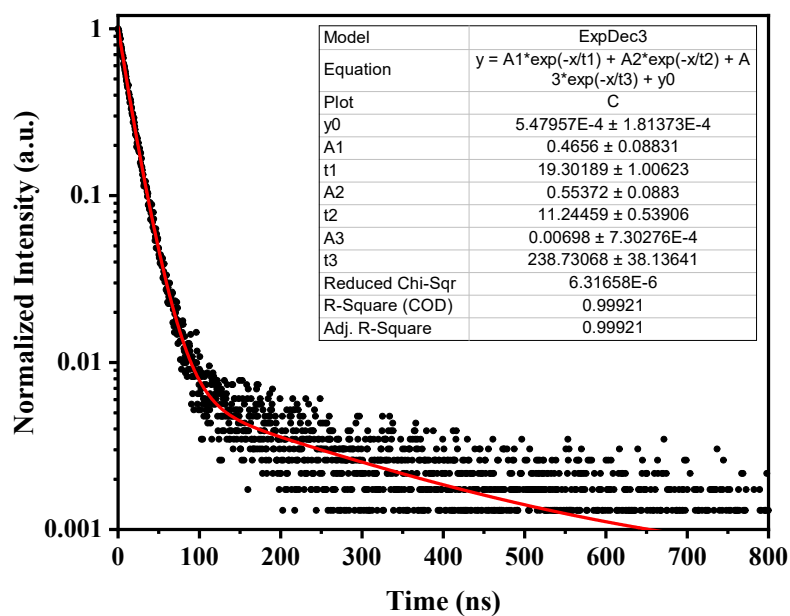

**Figure S2.** The PL decay curve (black) and corresponding tri-exponential fitting line (red) of s-g-C<sub>3</sub>N<sub>4</sub>-Ph. Inset: Fitting data.

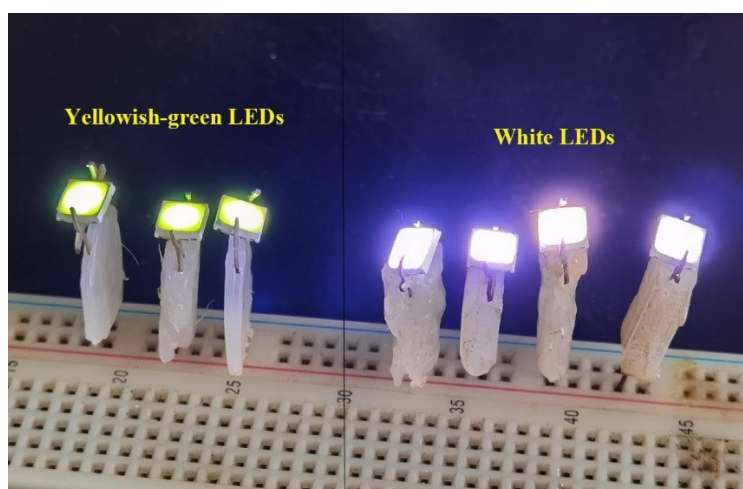

**Figure S3.** photographs of some LEDs in working.

**Table S1.** PL data of g-C<sub>3</sub>N<sub>4</sub>, g-C<sub>3</sub>N<sub>4</sub>-Ph and s-g-C<sub>3</sub>N<sub>4</sub>-Ph

| Materials                             | Emission region (nm) | $\lambda_{\text{ex,max}}$ (nm) | $\lambda_{\text{em,max}}$ (nm) | CIE value (x, y) | QY (%) |
|---------------------------------------|----------------------|--------------------------------|--------------------------------|------------------|--------|
| g-C <sub>3</sub> N <sub>4</sub>       | 425~575              | 361                            | 467                            | (0.14, 0.20)     | 8.0    |
| g-C <sub>3</sub> N <sub>4</sub> -Ph   | 455~625              | 326                            | 508                            | (0.21, 0.55)     | 24.0   |
| s-g-C <sub>3</sub> N <sub>4</sub> -Ph | 460~650              | 463                            | 517                            | (0.26, 0.62)     | 45.5   |

**Table S2.**  $\lambda_{\text{em,max}}$ , the maximum PL emission intensities and corresponding relative intensities ( $\lambda_{\text{ex}} = 463$  nm) of s-g-C<sub>3</sub>N<sub>4</sub>-Ph powders measured at every 20 °C from 20 °C to 200 °C

| Temperature (°C)               | 20    | 40   | 60   | 80   | 100  | 120  | 140  | 160  | 180  | 200  |
|--------------------------------|-------|------|------|------|------|------|------|------|------|------|
| $\lambda_{\text{em,max}}$ (nm) | 517   | 517  | 517  | 518  | 518  | 518  | 519  | 519  | 519  | 520  |
| Intensity (a. u.)              | 615   | 602  | 590  | 582  | 558  | 530  | 513  | 504  | 494  | 475  |
| Relative intensity (%)         | 100.0 | 97.9 | 96.0 | 94.6 | 90.8 | 86.2 | 83.4 | 82.0 | 80.3 | 77.2 |
